# Supplementary material for: Mitochondrial Gene Networks in Opioid Use Disorder: Multi-omic Evidence for Pathway-Specific Risk and Resilience
Source: Research Square preprint supplement (doi:10.21203/rs.3.rs-8434134/v1), 2026-02-16
Supplement: Supplementary file 1 [file 396fa8ec6a4c443ecf68b6ca.docx]

**Supplementary Table 3. Summary statistics for prioritized mitochondrial genes across molecular layers (FinnGen Release 11 endpoint F11)**

| **Gene** | **Molecular_Levels** | **Combined_Effect** | **Best_PPH4** | **Min_P_Value** | **Min_P_Value_Formatted** | **Pathway** | **Function** |
| --- | --- | --- | --- | --- | --- | --- | --- |
| CPT2 | Expression, Methylation, Protein | Mixed | 0.82 | 1.49E-04 | 1.49E-04 | Fatty Acid Metabolism | Fatty Acid Transport |
| MRPL21 | Expression, Methylation | Risk | 0.83 | 1.76E-05 | 1.76E-05 | Mitochondrial Translation | Protein Synthesis |
| MRPS17 | Expression, Methylation | Mixed | 0.91 | 1.51E-04 | 1.51E-04 | Mitochondrial Translation | Protein Synthesis |
| MTIF3 | Expression, Methylation | Risk | 0.75 | 2.93E-04 | 2.93E-04 | Mitochondrial Translation | Translation Initiation |
| QDPR | Expression, Methylation | Risk | 0.77 | 3.42E-04 | 3.42E-04 | Oxidative Phosphorylation | Tetrahydrobiopterin Metabolism |
| CHCHD2 | Expression, Methylation | Mixed | 0.68 | 5.22E-04 | 5.22E-04 | Mitochondrial Dynamics | Cristae Maintenance |
| COMT | Expression, Methylation | Risk | 0.71 | 3.27E-04 | 3.27E-04 | Neurotransmitter Metabolism | Catecholamine Metabolism |
| COMTD1 | Expression, Methylation | Mixed | 0.68 | 4.93E-04 | 4.93E-04 | Neurotransmitter Metabolism | Catecholamine Metabolism |
| MTHFD1L | Expression, Methylation | Risk | 0.62 | 6.22E-04 | 6.22E-04 | One-carbon Metabolism | Folate Metabolism |
| DNA2 | Expression, Methylation | Protective | 0.54 | 3.00E-03 | 3.00E-03 | mtDNA Maintenance | DNA Replication & Repair |
| ERAL1 | Expression, Methylation | Risk | 0.58 | 1.00E-03 | 1.00E-03 | Mitochondrial Translation | rRNA Chaperone |
| HADHB | Expression, Methylation | Protective | 0.56 | 2.00E-03 | 2.00E-03 | Fatty Acid Metabolism | Fatty Acid Beta-Oxidation |
| MRPS7 | Expression, Methylation | Risk | 0.51 | 5.00E-03 | 5.00E-03 | Mitochondrial Translation | Protein Synthesis |

For all prioritized genes supported by SMR + HEIDI filtering and colocalization (PPH4 > 0.50), the table provides: molecular layers involved; overall direction concordance across layers (Combined Effect); the maximum colocalization probability observed across layers (Best PPH4); the minimum nominal P value across layers (reported in both raw and formatted forms); pathway annotation; and canonical mitochondrial function. Genes are sorted to match Supplementary Table 1.
