# Supplementary material for: Mitochondrial Gene Networks in Opioid Use Disorder: Multi-omic Evidence for Pathway-Specific Risk and Resilience
Source: Research Square preprint supplement (doi:10.21203/rs.3.rs-8434134/v1), 2026-02-16
Supplement: Supplementary file 2 [file 8d1ca64e3c8b4dd957405838.docx]

**Supplementary Table 1.** **Multi-omic associations of prioritized mitochondrial genes with FinnGen Release 11 endpoint F11 (ICD-10: mental and behavioural disorders due to opioids).**

| **Gene** | **Molecular_Level** | **Effect_With_CI** | **P_Value_Formatted** | **PPH4_Formatted** | **Pathway** | **Effect_Direction** |
| --- | --- | --- | --- | --- | --- | --- |
| CPT2 | Expression | -0.80 (-1.21, -0.39) | 1.49E-04 | 0.81 | Fatty Acid Metabolism | Protective |
| CPT2 | Methylation | 0.61 (0.27, 0.95) | 3.90E-04 | 0.82 | Fatty Acid Metabolism | Risk |
| CPT2 | Protein | 0.65 (0.48, 0.82) | 5.12E-04 | 0.79 | Fatty Acid Metabolism | Risk |
| MRPL21 | Expression | 1.45 (1.24, 1.69) | 1.76E-05 | 0.83 | Mitochondrial Translation | Risk |
| MRPL21 | Methylation | 0.41 (0.17, 0.66) | 9.27E-04 | 0.78 | Mitochondrial Translation | Risk |
| MRPS17 | Expression | 1.92 (1.37, 2.69) | 1.51E-04 | 0.91 | Mitochondrial Translation | Risk |
| MRPS17 | Methylation | -0.43 (-0.72, -0.14) | 3.00E-03 | 0.77 | Mitochondrial Translation | Protective |
| MTIF3 | Expression | 1.17 (0.91, 1.43) | 2.93E-04 | 0.75 | Mitochondrial Translation | Risk |
| MTIF3 | Methylation | 0.58 (0.39, 0.77) | 5.76E-04 | 0.74 | Mitochondrial Translation | Risk |
| QDPR | Expression | 0.73 (0.52, 0.94) | 4.28E-04 | 0.76 | Oxidative Phosphorylation | Risk |
| QDPR | Methylation | 1.15 (0.94, 1.36) | 3.42E-04 | 0.77 | Oxidative Phosphorylation | Risk |
| CHCHD2 | Expression | 0.48 (0.31, 0.65) | 5.22E-04 | 0.67 | Mitochondrial Dynamics | Risk |
| CHCHD2 | Methylation | -0.27 (-0.43, -0.11) | 8.67E-04 | 0.68 | Mitochondrial Dynamics | Protective |
| COMT | Expression | 0.53 (0.35, 0.71) | 3.27E-04 | 0.69 | Neurotransmitter Metabolism | Risk |
| COMT | Methylation | 0.68 (0.28, 1.08) | 8.45E-04 | 0.71 | Neurotransmitter Metabolism | Risk |
| COMTD1 | Expression | 0.51 (0.22, 0.79) | 5.69E-04 | 0.66 | Neurotransmitter Metabolism | Risk |
| COMTD1 | Methylation (M‑1) | -0.42 (-0.68, -0.17) | 1.00E-03 | 0.68 | Neurotransmitter Metabolism | Protective |
| COMTD1 | Methylation (M‑2) | -0.11 (-0.17, -0.05) | 4.93E-04 | 0.67 | Neurotransmitter Metabolism | Protective |
| MTHFD1L | Expression | 0.45 (0.23, 0.67) | 7.35E-04 | 0.62 | One-carbon Metabolism | Risk |
| MTHFD1L | Methylation | 0.37 (0.16, 0.58) | 6.22E-04 | 0.61 | One-carbon Metabolism | Risk |
| DNA2 | Expression | -0.50 (-0.83, -0.17) | 3.00E-03 | 0.54 | mtDNA Maintenance | Protective |
| DNA2 | Methylation (M‑2) | -0.17 (-0.29, -0.05) | 5.00E-03 | 0.53 | mtDNA Maintenance | Protective |
| DNA2 | Methylation (M‑1) | -0.22 (-0.38, -0.06) | 7.00E-03 | 0.52 | mtDNA Maintenance | Protective |
| ERAL1 | Expression | 0.78 (0.30, 1.25) | 1.00E-03 | 0.58 | Mitochondrial Translation | Risk |
| ERAL1 | Methylation | 0.32 (0.13, 0.51) | 2.00E-03 | 0.57 | Mitochondrial Translation | Risk |
| HADHB | Expression | -0.78 (-1.26, -0.29) | 2.00E-03 | 0.56 | Fatty Acid Metabolism | Protective |
| HADHB | Methylation | -0.31 (-0.52, -0.10) | 3.00E-03 | 0.55 | Fatty Acid Metabolism | Protective |
| MRPS7 | Expression | 0.28 (0.09, 0.47) | 5.00E-03 | 0.51 | Mitochondrial Translation | Risk |
| MRPS7 | Methylation | 0.23 (0.06, 0.40) | 8.00E-03 | 0.5 | Mitochondrial Translation | Risk |

This table lists mitochondrial genes surpassing the significance and co‑localization thresholds (SMR *P* < 0.05, HEIDI *P* > 0.01, *PPH4* > 0.50) in at least one molecular layer. Columns: Gene; molecular layer(s) carrying the sentinel variant (DNA methylation, gene expression, protein abundance); effect size with 95 % *CI* (*β*, *CI*); nominal *P* value; posterior probability of shared causality (*PPH4*); mitochondrial pathway (MitoCarta 3.0); and effect direction on the FinnGen F11 phenotype (Risk/Protective). Positive β denotes increased F11 risk; negative β denotes protection. For genes with multiple methylation probes meeting the thresholds, distinct CpG instruments are labelled as M‑1 and M‑2 to match Fig. 2.
