# Supplementary material for: Mitochondrial Gene Networks in Opioid Use Disorder: Multi-omic Evidence for Pathway-Specific Risk and Resilience
Source: Research Square preprint supplement (doi:10.21203/rs.3.rs-8434134/v1), 2026-02-16
Supplement: Supplementary file 3 [file 92e92ffa2787f392398749d2.docx]

**Supplemental data**

**Figure legends**

**Supplementary Fig. 1. Genome-wide overview of multi-omic SMR signals and colocalization.**

Genome-wide distribution of SMR associations for mitochondrial molecular traits with the FinnGen endpoint F11. From top to bottom: methylation QTL (mQTL), expression QTL (eQTL) and protein QTL (pQTL) SMR results shown as -log10(P_SMR) values plotted by the chromosomal position of the lead cis-QTL instrument. The red dashed line indicates the layer-specific multiple-testing threshold (FDR < 0.05). The bottom panel shows Bayesian colocalization support (PPH4) for loci evaluated in colocalization analysis in the expression (orange) and methylation (blue) layers; dashed lines indicate PPH4 = 0.5 (colocalization-supporting) and PPH4 = 0.7 (strong support).

**Supplementary Fig. 2. Layer-specific evidence and within-network connectivity for representative mitochondrial genes.**

1. Layer-specific significance of SMR associations for representative mitochondrial genes across expression, methylation and protein layers. The x-axis shows -log10(P_SMR); point color indicates the evidence source (expression, methylation, protein).

B-D. Edge-weighted correlation networks centered on COMTD1 (B), CPT2 (C) and DNA2 (D), constructed from significant molecular features. Nodes represent molecular traits (triangles: expression; circles: methylation; squares: protein). Node size reflects association significance, and edges represent pairwise correlations, colored by direction (positive vs negative) with thickness proportional to |r|.

**Supplementary Fig. 3. Integrated mitochondrial molecular network across omic layers.**

1. Chord diagram summarizing the number of significant mitochondrial signals detected in each omic layer (methylation, expression and protein) and their overlaps.
2. Gene-level interaction network of mitochondrial candidates. Node color indicates evidence sources (single-layer vs multi-layer support) and node size is scaled to significance (-log10(P)). Edge width reflects connection strength.
3. Force-directed network of molecular traits across layers. Node shapes indicate molecular level, and edges show significant pairwise correlations (color: sign; width: |r|).

**Supplementary Fig. 4. Inter-omic correlation matrix of significant molecular features.**

Hierarchically clustered heatmap of Pearson correlation coefficients among significant molecular features across methylation, expression and protein layers. Rows/columns are molecular features (gene/probe identifiers). Color denotes correlation strength (green: positive; red: negative). Annotation bars indicate molecular level.

**Supplementary Fig. 5. Data availability across mitochondrial genes and molecular layers.**

Circular overview of data availability for MitoCarta mitochondrial genes across mQTL (methylation), eQTL (expression) and pQTL (protein) resources. Colored dots indicate the presence of at least one eligible cis-QTL instrument for a given gene in each layer; genes with data available in all three layers are highlighted as intersection genes.

**Supplementary Fig. 6. Correlations between prioritized mitochondrial genes and opioid risk genes.**

A-B. Heatmaps of gene-gene correlations between mitochondrial candidates and curated opioid risk genes, with hierarchical clustering. Annotations summarize mitochondrial functional modules and opioid gene categories (e.g., receptor classes and related biological pathways).

1. Subset of significant correlations (|r| >= 0.70, P < 0.05) annotated with correlation coefficients, highlighting representative axes such as CPT2-OPRM1, DBI-OPRK1 and HADHB-PENK.

**Supplementary Fig. 7. SMR-HEIDI landscape across omic layers and cross-gene networks.**

1. Scatterplots of -log10(P_SMR) versus -log10(P_HEIDI) for expression, methylation and protein layers. The horizontal dashed line indicates P_SMR = 0.05 and the vertical dashed line indicates P_HEIDI = 0.01; points passing both criteria (pleiotropy-consistent) are highlighted. Point size reflects colocalization support (PPH4).
2. Bipartite network linking prioritized mitochondrial genes (circles) to opioid risk genes (squares). Edge color indicates correlation direction (positive vs negative) and edge width indicates correlation strength.
3. Protein-pathway-OUD network summarizing Tier 2/3 protein links to opioid use disorder (OUD) and corresponding pathway categories.

**Supplementary Fig. 8. Metric contributions to composite scores for prioritized genes.**

1. Distribution of the five-component metrics used for composite scoring (effect strength, statistical significance, regulatory stability, direction consistency and functional impact). Each point represents a prioritized gene; point size indicates the composite score and point shape denotes functional category.
2. Stacked bar chart showing the percentage contribution of each metric to the composite score for each gene, ordered by composite score.

Abbreviations: SMR, summary-data-based Mendelian randomization; HEIDI, heterogeneity in dependent instruments; PPH4, posterior probability for a shared causal variant from Bayesian colocalization; mQTL/eQTL/pQTL, methylation/expression/protein quantitative trait loci; FDR, false discovery rate.
