# Supplementary material for: Mitochondrial Gene Networks in Opioid Use Disorder: Multi-omic Evidence for Pathway-Specific Risk and Resilience
Source: Research Square preprint supplement (doi:10.21203/rs.3.rs-8434134/v1), 2026-02-16
Supplement: Supplementary file 4 [file e950e8cd417a5f3e3adc3533.docx]

**Supplementary Table 4. Per‑probe SMR, HEIDI, and colocalization statistics for significant mitochondrial gene–trait pairs**

| **Gene** | **Molecular_Level** | **Probe_ID** | **Effect_Size** | **CI_Lower** | **CI_Upper** | **P_Value_Formatted** | **PPH4** | **Pathway** |
| --- | --- | --- | --- | --- | --- | --- | --- | --- |
| CPT2 | Expression | ENSG00000157184 | -0.80 | -1.21 | -0.39 | 1.49E-04 | 0.81 | Fatty Acid Metabolism |
| CPT2 | Methylation | cg20780708 | 0.61 | 0.27 | 0.95 | 3.90E-04 | 0.82 | Fatty Acid Metabolism |
| CPT2 | Protein | ENSG00000157184 | 0.65 | 0.48 | 0.82 | 5.12E-04 | 0.79 | Fatty Acid Metabolism |
| MRPL21 | Expression | ENSG00000197345 | 1.45 | 1.24 | 1.69 | 1.76E-05 | 0.83 | Mitochondrial Translation |
| MRPL21 | Methylation | cg07316676 | 0.41 | 0.17 | 0.66 | 9.27E-04 | 0.78 | Mitochondrial Translation |
| MRPS17 | Expression | ENSG00000239789 | 1.92 | 1.37 | 2.69 | 1.51E-04 | 0.91 | Mitochondrial Translation |
| MRPS17 | Methylation | cg17804177 | -0.43 | -0.72 | -0.14 | 3.00E-03 | 0.77 | Mitochondrial Translation |
| MTIF3 | Expression | ENSG00000122033 | 1.17 | 0.91 | 1.43 | 2.93E-04 | 0.75 | Mitochondrial Translation |
| MTIF3 | Methylation | ENSG00000122033 | 0.58 | 0.39 | 0.77 | 5.76E-04 | 0.74 | Mitochondrial Translation |
| QDPR | Expression | ENSG00000151552 | 0.73 | 0.52 | 0.94 | 4.28E-04 | 0.76 | Oxidative Phosphorylation |
| QDPR | Methylation | ENSG00000151552 | 1.15 | 0.94 | 1.36 | 3.42E-04 | 0.77 | Oxidative Phosphorylation |
| CHCHD2 | Expression | ENSG00000106153 | 0.48 | 0.31 | 0.65 | 5.22E-04 | 0.67 | Mitochondrial Dynamics |
| CHCHD2 | Methylation | cg25408620 | -0.27 | -0.43 | -0.11 | 8.67E-04 | 0.68 | Mitochondrial Dynamics |
| COMT | Expression | ENSG00000093010 | 0.53 | 0.35 | 0.71 | 3.27E-04 | 0.69 | Neurotransmitter Metabolism |
| COMT | Methylation | cg19930203 | 0.68 | 0.28 | 1.08 | 8.45E-04 | 0.71 | Neurotransmitter Metabolism |
| COMTD1 | Expression | ENSG00000165644 | 0.51 | 0.22 | 0.79 | 5.69E-04 | 0.66 | Neurotransmitter Metabolism |
| COMTD1 | Methylation (M‑1) | cg00478333 | -0.42 | -0.68 | -0.17 | 1.00E-03 | 0.68 | Neurotransmitter Metabolism |
| COMTD1 | Methylation (M‑2) | cg04944931 | -0.11 | -0.17 | -0.05 | 4.93E-04 | 0.67 | Neurotransmitter Metabolism |
| MTHFD1L | Expression | ENSG00000120254 | 0.45 | 0.23 | 0.67 | 7.35E-04 | 0.62 | One-carbon Metabolism |
| MTHFD1L | Methylation | cg26518907 | 0.37 | 0.16 | 0.58 | 6.22E-04 | 0.61 | One-carbon Metabolism |
| DNA2 | Expression | ENSG00000138346 | -0.50 | -0.83 | -0.17 | 3.00E-03 | 0.54 | mtDNA Maintenance |
| DNA2 | Methylation (M‑2) | cg24118715 | -0.17 | -0.29 | -0.05 | 5.00E-03 | 0.53 | mtDNA Maintenance |
| DNA2 | Methylation (M‑1) | cg06032048 | -0.22 | -0.38 | -0.06 | 7.00E-03 | 0.52 | mtDNA Maintenance |
| ERAL1 | Expression | ENSG00000132591 | 0.78 | 0.30 | 1.25 | 1.00E-03 | 0.58 | Mitochondrial Translation |
| ERAL1 | Methylation | cg09305577 | 0.32 | 0.13 | 0.51 | 2.00E-03 | 0.57 | Mitochondrial Translation |
| HADHB | Expression | ENSG00000138029 | -0.78 | -1.26 | -0.29 | 2.00E-03 | 0.56 | Fatty Acid Metabolism |
| HADHB | Methylation | cg07074065 | -0.31 | -0.52 | -0.10 | 3.00E-03 | 0.55 | Fatty Acid Metabolism |
| MRPS7 | Expression | ENSG00000125445 | 0.28 | 0.09 | 0.47 | 5.00E-03 | 0.51 | Mitochondrial Translation |
| MRPS7 | Methylation | cg23498628 | 0.23 | 0.06 | 0.40 | 8.00E-03 | 0.5 | Mitochondrial Translation |

This table lists each probe–gene pair that (i) passes the SMR test (P < 0.05) and the HEIDI test (P > 0.01) and (ii) shows colocalization support (PPH4 > 0.50), consistent with Fig. 2 and Supplementary Table 1. Columns: Gene, mitochondrial gene symbol; Molecular_Level, molecular layer (Expression, Methylation, or Protein; for genes with multiple CpG instruments, M‑1 and M‑2 denote distinct CpG probes); Probe_ID, identifier of the molecular probe (Ensembl gene ID for Expression/Protein; Illumina CpG ID for Methylation when available); Effect_Size, SMR effect estimate (β) on opioid use disorder risk; CI_Lower and CI_Upper, 95% confidence interval; P_Value_Formatted, SMR P value; PPH4, posterior probability of a shared causal variant from colocalization; Pathway, curated mitochondrial pathway annotation. Positive β indicates increased risk and negative β indicates a protective effect.
