# Supplementary material for: Mitochondrial Gene Networks in Opioid Use Disorder: Multi-omic Evidence for Pathway-Specific Risk and Resilience
Source: Research Square preprint supplement (doi:10.21203/rs.3.rs-8434134/v1), 2026-02-16
Supplement: Supplementary file 5 [file fd45493d9750d1ee3dd05c4b.docx]

**Supplementary Table 2．Functional pathway classification prioritized mitochondrial genes associated with FinnGen Release 11 endpoint F11 (proxy for opioid-related disorder liability)**

| **Pathway** | **Function** | **Genes** | **Gene_Count** |
| --- | --- | --- | --- |
| Mitochondrial Translation | Protein Synthesis | MRPL21, MRPS17, MRPS7 | 3 |
| Neurotransmitter Metabolism | Catecholamine Metabolism | COMT, COMTD1 | 2 |
| Fatty Acid Metabolism | Fatty Acid Beta-Oxidation | HADHB | 1 |
| Fatty Acid Metabolism | Fatty Acid Transport | CPT2 | 1 |
| Mitochondrial Dynamics | Cristae Maintenance | CHCHD2 | 1 |
| Mitochondrial Translation | Translation Initiation | MTIF3 | 1 |
| Mitochondrial Translation | rRNA Chaperone | ERAL1 | 1 |
| One-carbon Metabolism | Folate Metabolism | MTHFD1L | 1 |
| Oxidative Phosphorylation | Tetrahydrobiopterin Metabolism | QDPR | 1 |
| mtDNA Maintenance | DNA Replication & Repair | DNA2 | 1 |

Genes from Supplementary Table 1 were grouped into non‑overlapping mitochondrial pathways (MitoCarta 3.0). Columns: pathway category; specific cellular function; member genes (comma‑separated); and number of genes per pathway (Gene Count). Pathways are ordered by Gene Count.
